# Supplementary material
Source: Springer Nature journal article supplement (https://www.springermedizin.de/resource/supplementary/12879_2010_1378_MOESM2_ESM.pdf/9443120)

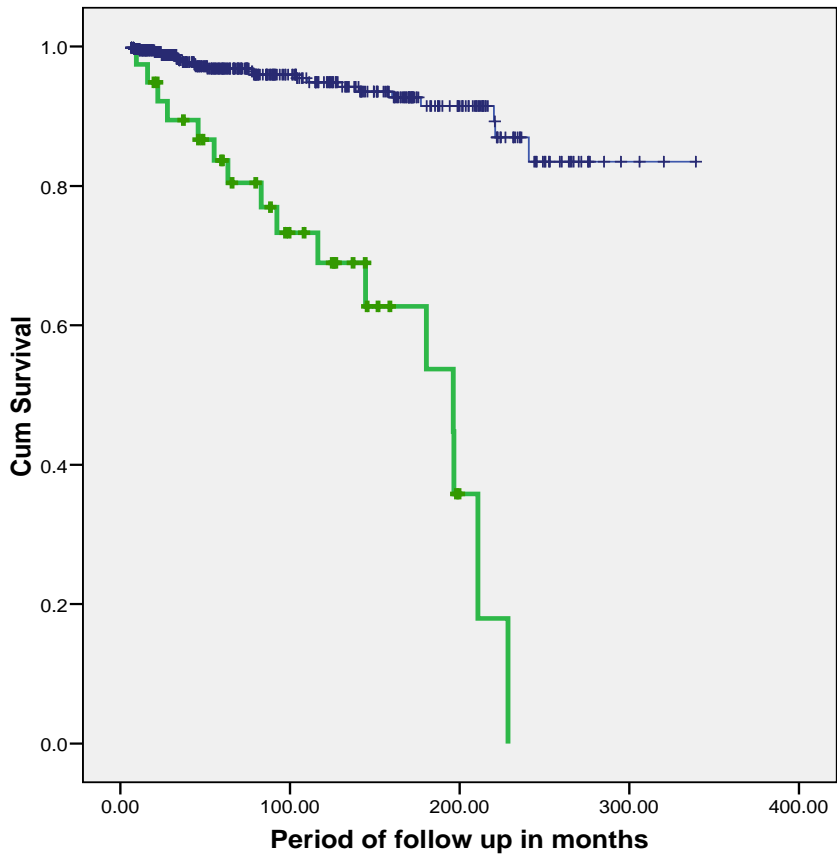

### Injecting drug users

- Not IDU
- IDU
- Not IDU-censored
- IDU-censored

Supplement: MOESM2 [file 9443120]
